# Supplementary material for: Reduced North American terrestrial primary productivity linked to anomalous Arctic warming
Source: Springer Nature journal article supplement (doi:10.1038/ngeo2986), 2017-07-10
Supplement: 41561_2017_BFngeo2986_MOESM1_ESM.pdf [file 41561_2017_BFngeo2986_MOESM1_ESM.pdf]

In the format provided by the authors and unedited.

2 **Reduced North American terrestrial primary productivity linked to anomalous**  
3 **Arctic warming**

4

5 Jin-Soo Kim<sup>1</sup>, Jong-Seong Kug<sup>1,\*</sup>, Su-Jong Jeong<sup>2,\*</sup>, Deborah N. Huntzinger<sup>3</sup>, Anna M.  
6 Michalak<sup>4</sup>, Christopher R. Schwalm<sup>5,6</sup>, Yaxing Wei<sup>7</sup> and Kevin Schaefer<sup>8</sup>

7

8

9 <sup>1</sup> Division of Environmental Science and Engineering,  
10 Pohang University of Science and Technology (POSTECH), Pohang, South Korea

11 <sup>2</sup> School of Environmental Science and Engineering,  
12 South University of Science and Technology of China (SUSTECH), Shenzhen, China

13 <sup>3</sup> School of Earth Sciences and Environmental Sustainability, Northern Arizona  
14 University, Flagstaff, Arizona 86011, USA.

15 <sup>4</sup> Department of Global Ecology, Carnegie Institution for Science, Stanford, California  
16 94305, USA.

17 <sup>5</sup> Woods Hole Research Center, Falmouth, Massachusetts 02540, USA.

18 <sup>6</sup> Center for Ecosystem Science and Society, Northern Arizona University, Flagstaff  
19 Arizona 86011, USA.

20 <sup>7</sup> Environmental Sciences Division and Climate Change Science Institute, Oak Ridge  
21 National Laboratory, Oak Ridge, Tennessee 37831, USA.

22 <sup>8</sup> National Snow and Ice Data Center, Cooperative Institute for Research in Environmental  
23 Sciences, University of Colorado at Boulder, Boulder, Colorado 80309, USA

24

25

26 \*Corresponding authors. Email: jskug@postech.ac.kr and sujong@sustc.edu.cn

27

## 28 Sensitivity Analyses

29 The Arctic temperature-induced teleconnection, such as temperature and precipitation,  
30 affects terrestrial productivity over the most of North America, but terrestrial responses  
31 would be different depending on land cover, plant type, and region. In this regard, multiple  
32 regression approach was used in this study to investigate the individual contributions of  
33 the temperature and precipitation anomalies<sup>1,2</sup> for both of data- and process-driven GPP as  
34 shown in Supplementary Fig. 8 and 9 as using Eq. 1.

$$\begin{aligned} 35 \quad \delta(GPP) &= \frac{\partial(GPP)}{\partial(\text{Temp})} \delta(\text{Temp}) + \frac{\partial(GPP)}{\partial(\text{Prec})} \delta(\text{Prec}) + \varepsilon \\ 36 \quad &= \gamma_{GPP}^{\text{Temp}} \delta\text{Temp} + \gamma_{GPP}^{\text{Prec}} \delta\text{Prec} + \varepsilon, \quad (1) \end{aligned}$$

37 where  $\gamma_{GPP}^{\text{Temp}}$  and  $\gamma_{GPP}^{\text{Prec}}$  are obtained from the coefficients using the partial regression  
38 method; these parameters approximately represent the sensitivities of GPP to surface  
39 temperature (Supplementary Fig. 8a,c and 9a,c) and precipitation (Supplementary Fig. 8b,d  
40 and 9b,d), respectively. As a result, the northern part of North America has relatively high  
41 sensitivity of GPP to temperature as temperature-limited ecosystems, while sensitivity of  
42 GPP to precipitation shows significant signal in the southwestern United States as water-  
43 limited ecosystems. Interestingly, anomalous Arctic warming-induced teleconnection has  
44 negative temperature anomalies over the northern part of North America and negative  
45 precipitation anomalies over the southwestern United States. This in-phase relationship  
46 between GPP sensitivity to atmospheric anomalies and Arctic-induced atmospheric  
47 anomalies amplify Arctic warming impacts on terrestrial response over North America. It  
48 can be written as follows:

$$49 \quad \frac{d(GPP)}{d(\text{ART})} = \frac{\partial(GPP)}{\partial(\text{Temp})} \frac{d(\text{Temp})}{d(\text{ART})} + \frac{\partial(GPP)}{\partial(\text{Prec})} \frac{d(\text{Prec})}{d(\text{ART})} + \varepsilon$$

50 
$$\gamma_{GPP}^{ART} = \gamma_{GPP}^{Temp} \gamma_{Temp}^{ART} + \gamma_{GPP}^{Prec} \gamma_{Prec}^{ART} + \varepsilon \quad (2)$$

51 where  $\gamma_{GPP}^{ART}$  is GPP anomalies with respect to the ART index. Likewise,  $\gamma_{Temp}^{ART}$  and  
 52  $\gamma_{Prec}^{ART}$  are temperature and precipitation anomalies with respect to the ART index as shown  
 53 in Fig. 1c,d, respectively.

54 This sensitivity analysis can be applied to future changes in Arctic-induced GPP anomalies  
 55 by comparing historical and RCP4.5 scenario in the CMIP5 ESMs. Based on Eq. 2, the  
 56 future changes in GPP responses to the Arctic temperature variation ( $\Delta\gamma_{GPP}^{ART}$ ) can be  
 57 separated by four terms as follows:

58 
$$\Delta\gamma_{GPP}^{ART} = \Delta\gamma_{GPP}^{Temp} \gamma_{Temp}^{ART} + \Delta\gamma_{Temp}^{ART} \gamma_{GPP}^{Temp} + \Delta\gamma_{GPP}^{Prec} \gamma_{Prec}^{ART} + \Delta\gamma_{Prec}^{ART} \gamma_{GPP}^{Prec} \quad (3)$$

59 Consequently, enhanced GPP response to the Arctic temperature variation in future  
 60 projection (Supplementary Fig. 10) would be explained by enhanced sensitivity of GPP to  
 61 local temperature under greenhouse warming (Supplementary Fig. 11). This is consistent  
 62 with several previous studies that argued stronger sensitivity of terrestrial response to local  
 63 temperature variation under greenhouse warming<sup>3-7</sup>.

64

65 **Supplementary References**

66

67 1. Piao, S. *et al.* Evaluation of terrestrial carbon cycle models for their response to  
 68 climate variability and to CO<sub>2</sub> trends. *Global Change Biology*. **19**, 2117–2132  
 69 (2013).  
 70 2. Kim, J. S., Kug, J. S., Yoon, J. H. & Jeong, S. J. Increased atmospheric CO<sub>2</sub> growth  
 71 rate during El Niño driven by reduced terrestrial productivity in the CMIP5 ESMs.  
 72 *J. Clim.* **29**, 8783–8805 (2016).

- 73 3. Gu, L. *et al.*, The 2007 eastern US spring freezes: Increased cold damage in a warming  
74 world? *Bioscience* **58**, 253–262 (2008).
- 75 4. Rigby, J. R. & Porporato, A. Spring frost risk in a changing climate. *Geophys. Res.*  
76 *Lett.* **35**, L12703 (2008).
- 77 5. Augspurger, C. K. Spring 2007 warmth and frost: phenology, damage and refoilation  
78 in a temperate deciduous forest. *Funct Ecol* **23**, 1031–1039 (2009).
- 79 6. Augspurger, C. K. Reconstructing patterns of temperature, phenology, and frost  
80 damage over 124 years: Spring damage risk is increasing. *Ecology* **94**, 41–50  
81 (2013).
- 82 7. Liu, Y. W. *et al.* Changes in interannual climate sensitivities of terrestrial carbon  
83 fluxes during the 21st century predicted by CMIP5 Earth System Models. *J.*  
84 *Geophys. Res.* **121**, 903–918 (2016).
- 85 8. Wei, Y. *et al.* The North American Carbon Program Multi-scale synthesis and  
86 Terrestrial Model Intercomparison Project–Part 2: environmental driver data.  
87 *Geosci. Model. Dev.* **6**, 5375–5422 (2013).
- 88 9. Rayner, A. *et al.* Global analyses of sea surface temperature, sea ice, and night marine  
89 air temperature since the late nineteenth century. *J. Geophys. Res.* **108**, 4407 (2003).

90 **Supplementary Table 1 | Lagged autocorrelation values for the ART index**  
 91

| Correlation | Lag +1 month | Lag +2 month |
|-------------|--------------|--------------|
| Jan         | 0.04         | 0.08         |
| Feb         | -0.11        | -0.00        |
| Mar         | 0.37*        | 0.38*        |
| Apr         | 0.48*        | 0.33*        |
| May         | 0.35*        | 0.11         |
| Jun         | 0.55*        | 0.28         |
| Jul         | 0.44*        | 0.23         |
| Aug         | 0.64*        | 0.45*        |
| Sep         | 0.67*        | 0.28         |
| Oct         | 0.33*        | -0.03        |
| Nov         | 0.24         | 0.07         |
| Dec         | 0.07         | -0.10        |

92

93 \*indicates significance at the 95% confidence level on the basis of a Student's *t*-test.

94  
95

**Supplementary Table 2 | Used periods of each dataset**

| Data                   | Affiliation                                                   | Spatial resolution       | Period                                      |
|------------------------|---------------------------------------------------------------|--------------------------|---------------------------------------------|
| HadCRUT4               | University of York                                            | 5° × 5°                  | 1979–2015                                   |
| ERA-Interim            | European Centre for Medium-Range Weather Forecasts Reanalysis | 1.5° × 1.5°              | 1979–2015                                   |
| Climatic Research Unit | University of East Anglia                                     | 0.5° × 0.5°              | 1979–2014                                   |
| Hadley Centre Sea Ice  | Met Office Hadley Centre                                      | 1° × 1°                  | 1979–2015                                   |
| NDVI                   | NASA Ames Ecological Forecasting Lab                          | 0.5° × 0.5° (re-gridded) | 1982–2013                                   |
| MTE GPP                | Max Planck Institute for biogeochemistry                      | 0.5° × 0.5°              | 1982–2011                                   |
| MsTMIP                 | North American Carbon Program                                 | 0.5° × 0.5°              | 1979–2010                                   |
| Earth System Model     | Coupled Model Intercomparison Project Phase 5                 | 2.5° × 2.5° (re-gridded) | 1976–2005 (historical), 2070–2099 (RCP 4.5) |

96

97 **Supplementary Table 3 | MsTMIP models used in this study**  
 98

| Model name    | Affiliation                                                      | Nitrogen cycling included <sup>1</sup> |
|---------------|------------------------------------------------------------------|----------------------------------------|
| Biome-BGC     | NASA Ames                                                        | Yes                                    |
| CLASS-CTEM-N  | McMaster University                                              | Yes                                    |
| CLM4          | Oak Ridge National Lab                                           | Yes                                    |
| CLM4VIC       | Pacific Northwest National Lab                                   | Yes                                    |
| DLEM          | Auburn University                                                | Yes                                    |
| GTEC          | Oak Ridge National Lab                                           | No                                     |
| ISAM          | University of Illinois Urbana Champaign                          | Yes                                    |
| LPJ-wsl       | Laboratoire des Sciences du Climat et de l'Environnement, France | No                                     |
| ORCHIDEE-LSCE | Laboratoire des Sciences du Climat et de l'Environnement, France | No                                     |
| SiB3          | NASA Jet Propulsion Laboratory                                   | No                                     |
| SiBCASA       | National Snow and Ice Data Center                                | No                                     |
| TEM6          | Oak Ridge National Laboratory                                    | Yes                                    |
| TRIPLEX-GHG   | University of Quebec at Montreal                                 | Yes                                    |
| VEGAS2.1      | University of Maryland                                           | No                                     |
| VISIT         | National Institute for Environ. Studies, Japan                   | No                                     |

99  
 100 <sup>1</sup>Models use North American Regional Reanalysis (NARR) and CRU-NCEP climate  
 101 forcing, time-varying land-use history, and atmospheric CO<sub>2</sub> concentration; however,  
 102 nitrogen cycling simulations are different for each model<sup>8</sup>.

103  
104

**Supplementary Table 4 | CMIP5 ESMs used in this study**

| Model Name     | Modeling Center (or Group)                                                                                                                                                      |
|----------------|---------------------------------------------------------------------------------------------------------------------------------------------------------------------------------|
| BNU-ESM        | College of Global Change and Earth System Science,<br>Beijing Normal University                                                                                                 |
| CCSM4          | National Center for Atmospheric Research                                                                                                                                        |
| CESM1-BGC      | Community Earth System Model Contributors                                                                                                                                       |
| CESM1-CAM5     |                                                                                                                                                                                 |
| CESM1-WACCM    |                                                                                                                                                                                 |
| CanESM2        | Canadian Centre for Climate Modelling and Analysis                                                                                                                              |
| GFDL-ESM2M     | NOAA Geophysical Fluid Dynamics Laboratory                                                                                                                                      |
| GISS-E2-H-CC   | NASA Goddard Institute for Space Studies                                                                                                                                        |
| GISS-E2-H      |                                                                                                                                                                                 |
| GISS-E2-R-CC   |                                                                                                                                                                                 |
| GISS-E2-R      |                                                                                                                                                                                 |
| HadGEM2-CC     | Met Office Hadley Centre                                                                                                                                                        |
| HadGEM2-ES     |                                                                                                                                                                                 |
| IPSL-CM5A-LR   | Institute Pierre Simon Laplace                                                                                                                                                  |
| IPSL-CM5A-MR   |                                                                                                                                                                                 |
| IPSL-CM5B-LR   |                                                                                                                                                                                 |
| MIROC-ESM-CHEM | Japan Agency for Marine-Earth Science and Technology,<br>Atmosphere and Ocean Research Institute (The University<br>of Tokyo), and National Institute for Environmental Studies |
| MIROC-ESM      |                                                                                                                                                                                 |
| MPI-ESM-LR     | Max Planck Institute for Meteorology                                                                                                                                            |
| MPI-ESM-MR     |                                                                                                                                                                                 |
| NorESM1-ME     | Norwegian Climate Centre                                                                                                                                                        |
| NorESM1-M      |                                                                                                                                                                                 |
| bcc-csm1-1-m   | Beijing Climate Center,<br>China Meteorological Administration                                                                                                                  |
| bcc-csm1-1     |                                                                                                                                                                                 |
| inmcm4         | Institute of Numerical Mathematics,<br>Russian Academy of Sciences                                                                                                              |

105



**Supplementary Table 5 | Ameriflux sites used in this study**

| Site                                          | Latitude | Longitude | Vegetation type              | Year        | Reference doi        | Anomalous Arctic warming                                   | Anomalous Arctic cooling                                               |
|-----------------------------------------------|----------|-----------|------------------------------|-------------|----------------------|------------------------------------------------------------|------------------------------------------------------------------------|
| US-MMS (Morgan Monroe State Forest)           | 39.32    | -86.41    | Deciduous Broadleaf Forests  | 1999 – 2014 | 10.17190/AMF/1246080 | 2002, 2003, 2005, 2011, 2013, 2014                         | 1999, 2000, 2001, 2004, 2006, 2007, 2008, 2009, 2010, 2012             |
| US-UMB (Univ. of Mich. Biological Station)    | 45.56    | -84.71    | Deciduous Broadleaf Forests  | 2000 – 2014 | 10.17190/AMF/1246107 | 2002, 2003, 2011, 2013, 2014                               | 2000, 2001, 2004, 2005, 2006, 2007, 2008, 2009, 2010, 2012             |
| US-Ha1 (Harvard Forest EMS Tower)             | 42.54    | -72.17    | Deciduous Broadleaf Forests  | 1991 – 2012 | 10.17190/AMF/1246059 | 1995, 1996, 1997, 1998, 2000, 2002, 2003, 2004, 2005, 2011 | 1991, 1992, 1993, 1994, 1999, 2001, 2006, 2007, 2008, 2009, 2010, 2012 |
| US-NR1 (Niwot Ridge Forest)                   | 40.03    | -105.55   | Evergreen Needleleaf Forests | 1998 – 2014 | 10.17190/AMF/1246088 | 2002, 2003, 2005, 2011, 2013, 2014                         | 1999, 2000, 2001, 2004, 2006, 2007, 2008, 2009, 2010, 2012             |
| US-Ne1 (Mead-irrigated continuous maize site) | 41.17    | -96.48    | Croplands                    | 2001 – 2013 | 10.17190/AMF/1246084 | 2002, 2003, 2011, 2013                                     | 2001, 2004, 2005, 2006, 2007, 2008, 2009,                              |
| US-Ne2 (Irrigated)                            | 41.16    | -96.47    | Croplands                    |             | 10.17190/AMF/1246085 |                                                            |                                                                        |

|                                                                   |       |        |                           |                   |                          |                        |                                                                              |
|-------------------------------------------------------------------|-------|--------|---------------------------|-------------------|--------------------------|------------------------|------------------------------------------------------------------------------|
| maize–<br>soybean<br>rotation<br>site)                            |       |        |                           |                   |                          |                        | 2010,<br>2012                                                                |
| US-Ne3<br>(Rainfed<br>maize–<br>soybean<br>rotation<br>site)      | 41.18 | –96.44 | Cropland<br>s             |                   | 10.17190/AMF/12460<br>86 |                        |                                                                              |
| US-ARM<br>(ARM<br>Southern<br>Great<br>Plains<br>site-<br>Lamont) | 36.61 | –97.49 | Cropland<br>s             | 2003<br>–<br>2012 | 10.17190/AMF/12460<br>27 | 2003,<br>2005,<br>2011 | 2004,<br>2006,<br>2007,<br>2008,<br>2009,<br>2010,<br>2012                   |
| US-Los<br>(Lost<br>Creek)                                         | 46.08 | –89.98 | Permane<br>nt<br>Wetlands | 2000<br>–<br>2014 | 10.17190/AMF/12460<br>71 | 2002,<br>2003,<br>2011 | 2000,<br>2001,<br>2004,<br>2005,<br>2006,<br>2007,<br>2008,<br>2009,<br>2010 |

108

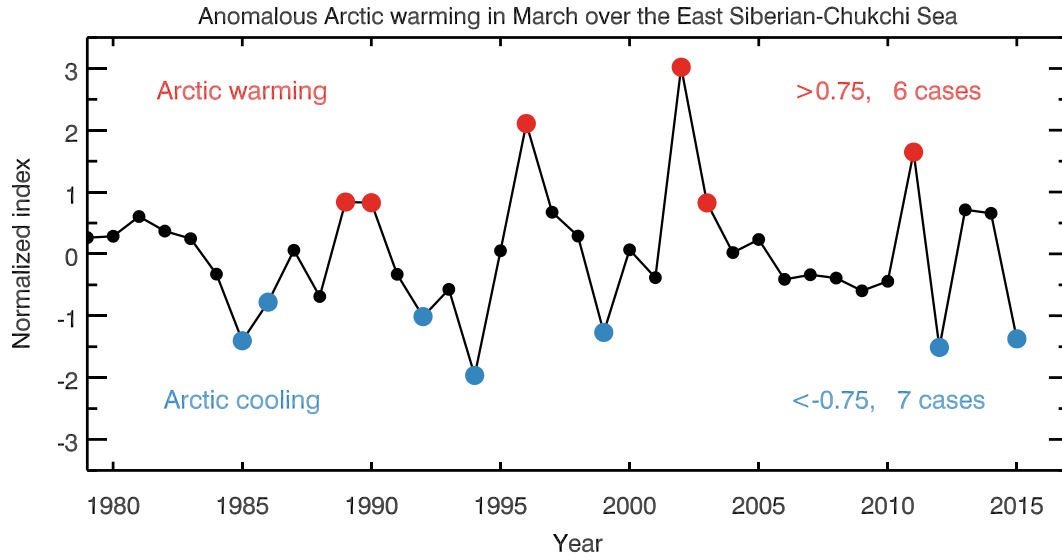

109

110 **Supplementary Figure 1 | Time series of Normalized March Arctic temperature.**

111 Anomalous Arctic warming in March over the East Siberian–Chukchi Sea (160° E–160°

112 W, 65°–80° N) for the period 1979–2015. Red and blue dots indicate  $>0.75\sigma$  and

113  $<-0.75\sigma$  years of Arctic temperature anomaly, respectively.

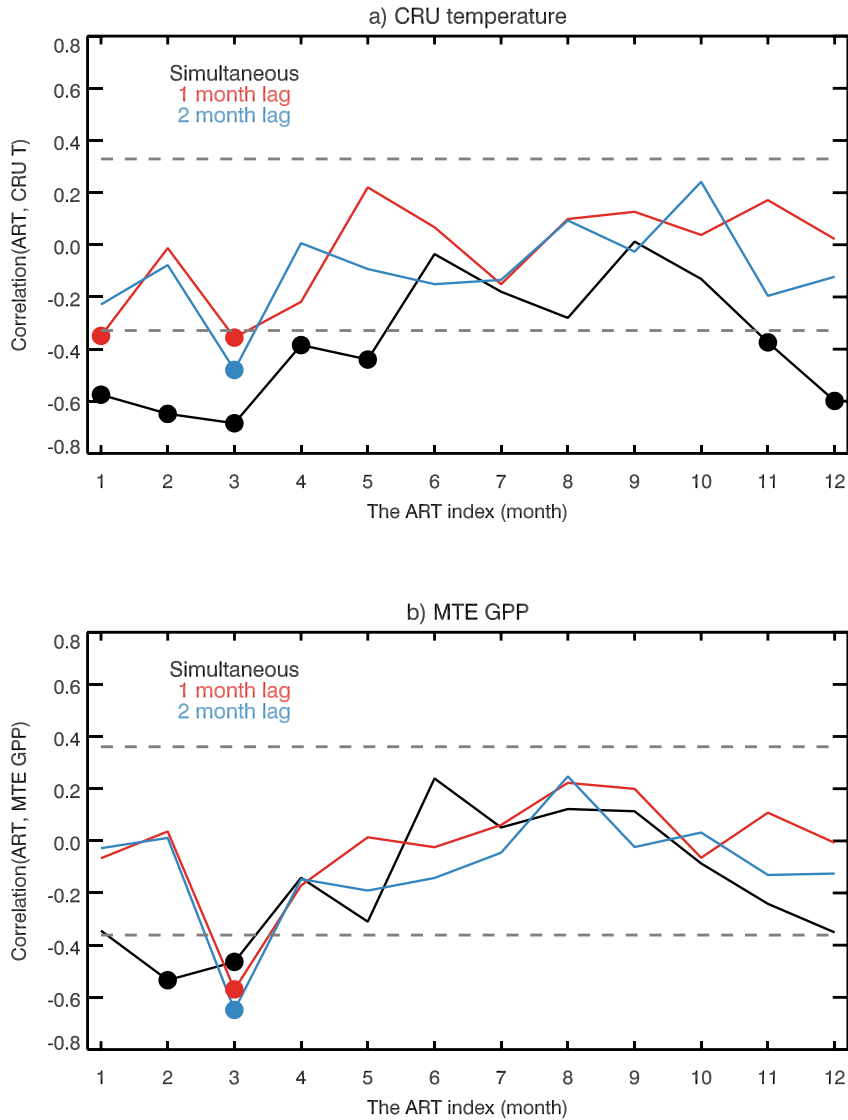

114  
 115 **Supplementary Figure 2 | Relationship between anomalous Arctic warming and**  
 116 **anomalies over North America. a, b,** Correlation coefficients between anomalous  
 117 Arctic warming over the East Siberian–Chukchi Sea (160° E–160° W, 65°–80° N), i.e.,  
 118 ART index, and temperature anomaly (a) and MTE GPP (b) over North America (125°–  
 119 85° W, 30°–60° N). Black, red, blue lines show correlations for simultaneous, 1 month  
 120 lag, and 2 month lag, respectively. For example, blue line in March is a correlation  
 121 coefficient between the March ART index and temperature anomaly over North America  
 122 in May. Dashed lines indicate the significant criteria at the 95% confidence level  
 123 (calculated using a Student’s *t*-test) and filled circle shows significant correlation values.

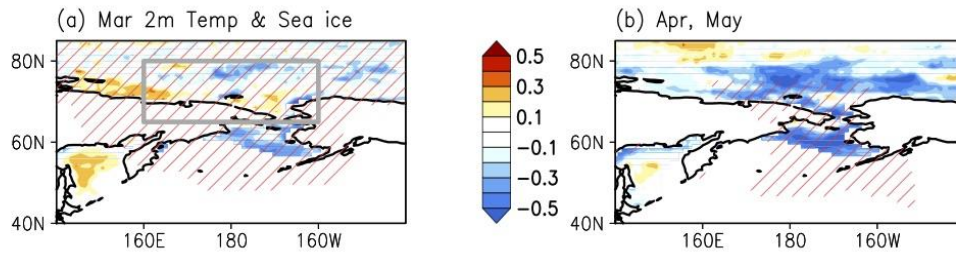

124

125

126

127

128

129

130

131

132

**Supplementary Figure 3 | Relationship between surface temperature and sea-ice over the East Siberian–Chukchi Sea. a, b,** Correlation coefficients of sea-ice concentration, provided by Hadley Centre Sea Ice data for the period 1979–2015<sup>9</sup> (<http://www.metoffice.gov.uk/hadobs/hadisst>), in March (**a**) and April–May (**b**) with respect to the Arctic temperature (ART) index based on the March surface temperature in the East Siberian–Chukchi Sea (gray box; 160° E–160° W, 65°–80° N). Hatching indicates significant regions for 2-m temperature anomalies at the 95% confidence level based on a Student’s *t*-test.

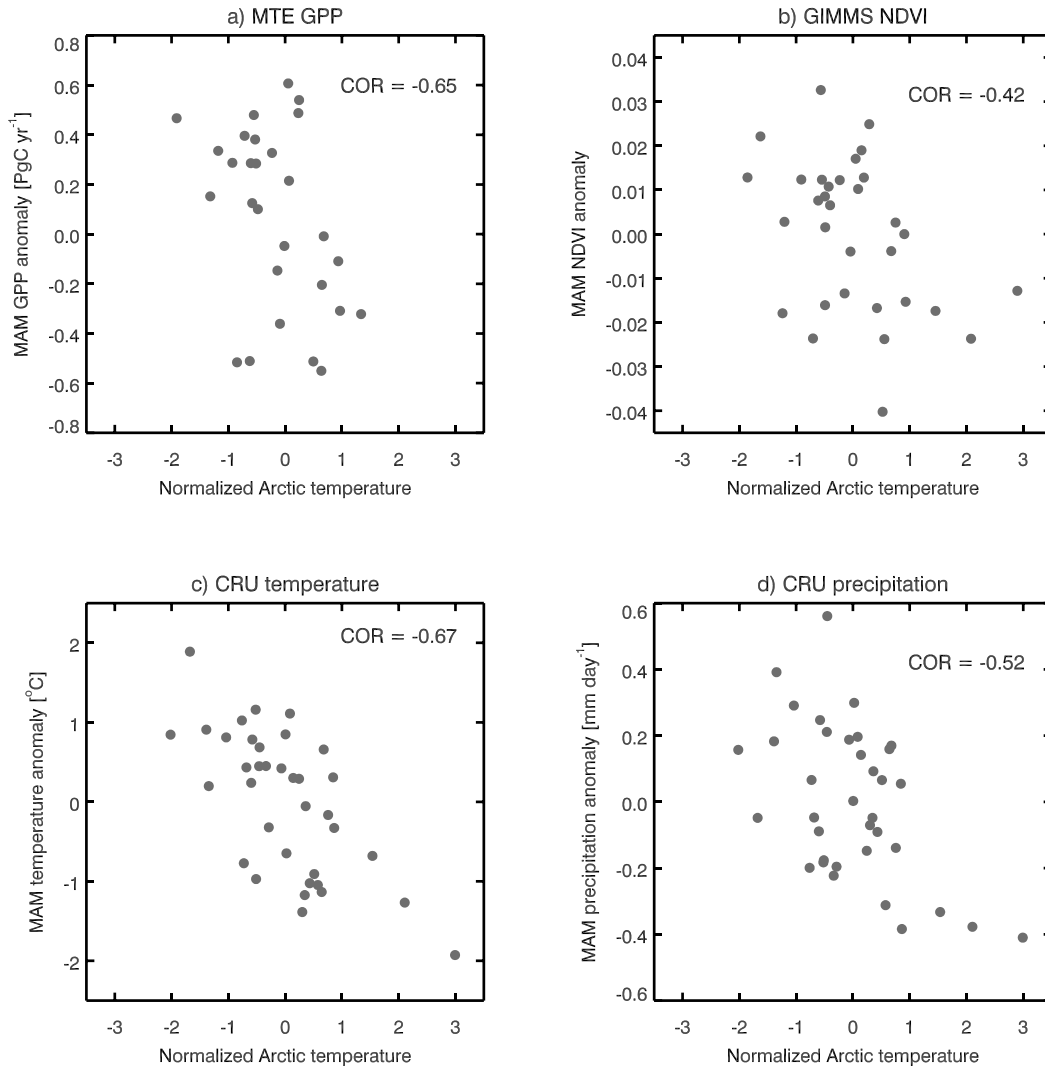

133  
 134  
 135  
 136  
 137  
 138

**Supplementary Figure 4 | Scatter plot of spring season anomaly over North America and normalized Arctic temperature anomaly.** a–d, The normalized Arctic temperature anomaly versus March–May mean MTE GPP (a), GIMMS NDVI (b), temperature (c) over North America (125°–85° W, 30°–60° N), and precipitation (d) over South Central United States (110°–100° W, 32°–38° N).

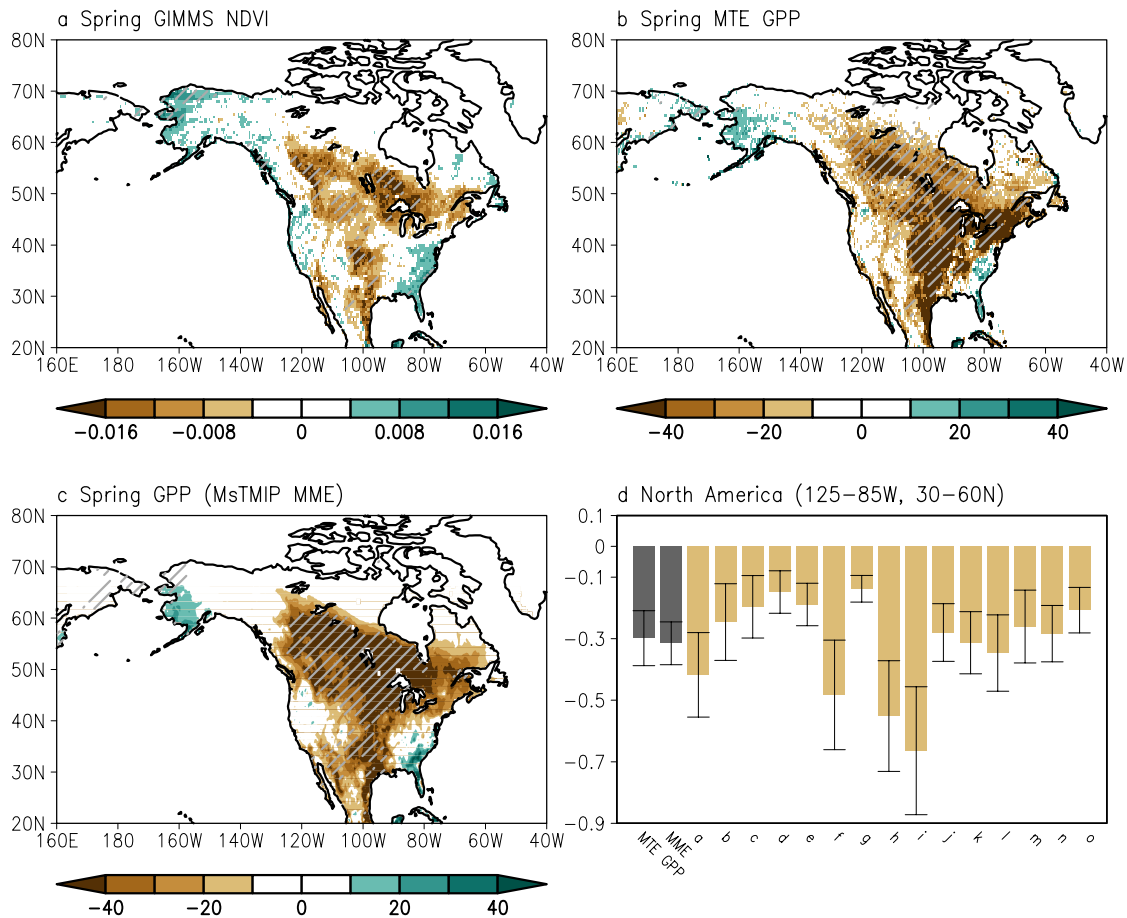

139  
 140  
 141  
 142  
 143  
 144  
 145  
 146  
 147  
 148  
 149  
 150  
 151

**Supplementary Figure 5 | Arctic warming impacts on spring terrestrial productivity.** **a–c**, Regression coefficients of the spring (March–May) Global Inventory Modeling and Mapping Studies NDVI (**a**), flux tower data-driven GPP from the Max Planck Institute for biogeochemistry ( $\text{gC m}^{-2} \text{yr}^{-1}$ ) (**b**), and MME simulated GPP based on the Multi-scale Synthesis and Terrestrial Model Intercomparison Project (MSTMIP) ( $\text{gC m}^{-2} \text{yr}^{-1}$ ) (**c**) with respect to the ART index for the period 1982–2010 that common period of data sets while Fig. 2 is based on available period for each data set. Hatching denotes local significance at the 95% confidence level on the basis of a Student's *t*-test. **d**, Regression coefficient of the total GPP over North America ( $125^{\circ}$ – $85^{\circ}$ W,  $30^{\circ}$ – $60^{\circ}$ N) with respect to the ART index based on individual models ( $\text{PgC yr}^{-1}$ ). The scale bars represent a range of 95% confidence levels from internal variability based on a Student's *t*-test.

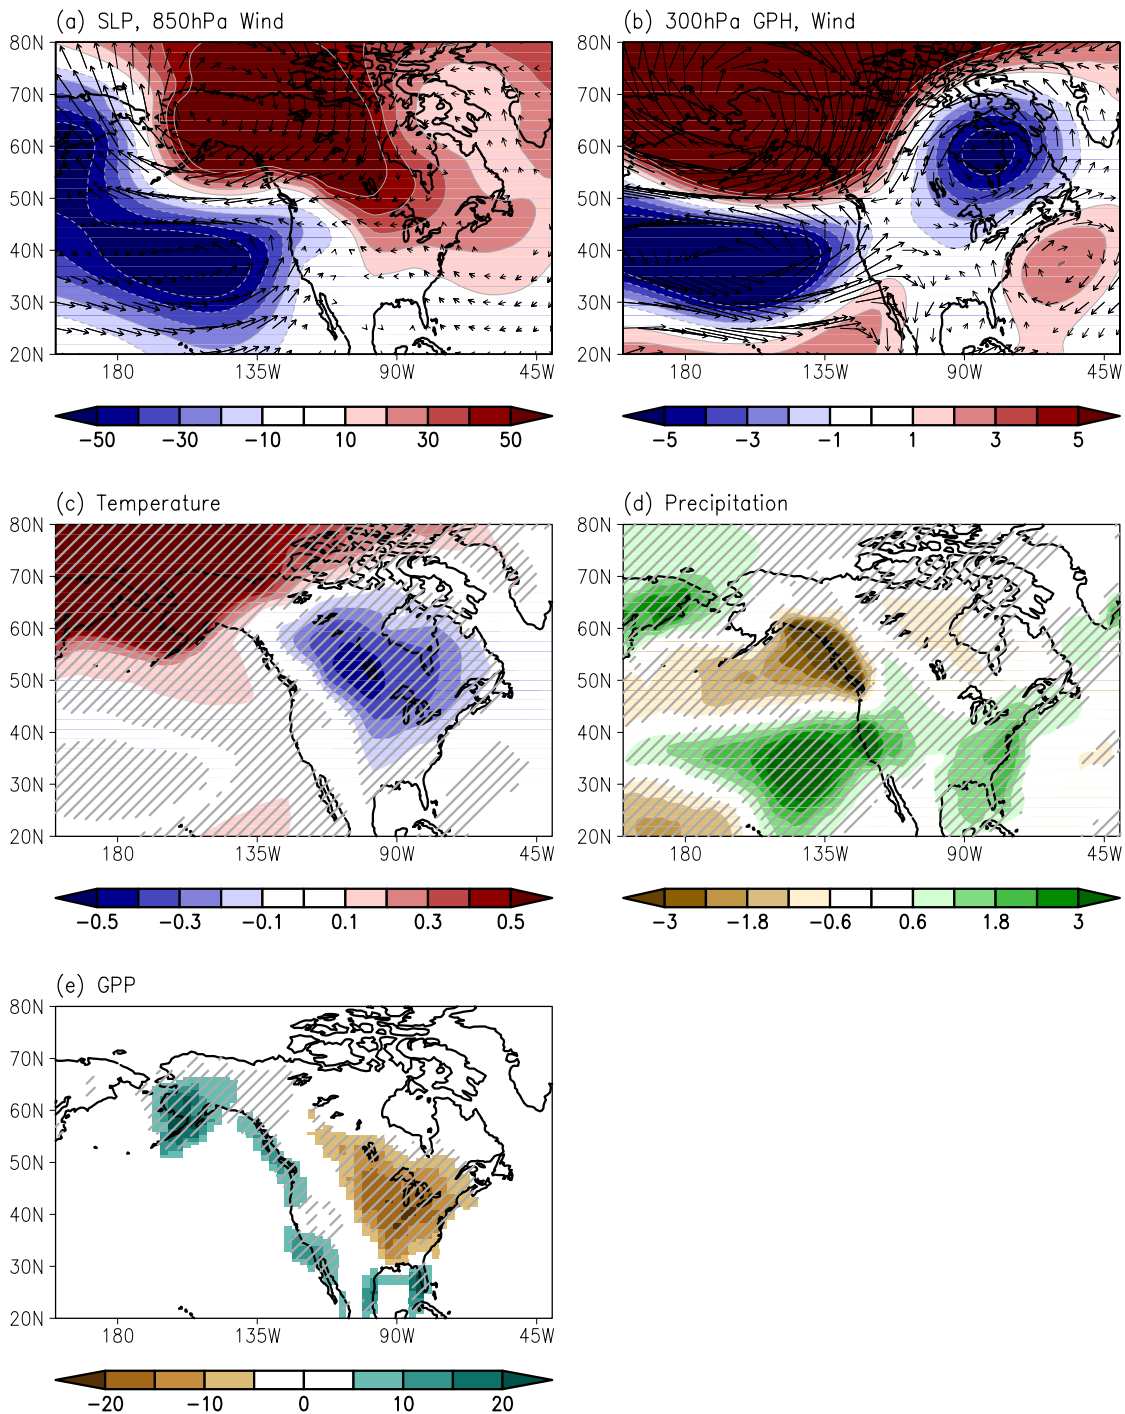

153  
 154 **Supplementary Figure 6 | Arctic temperature-induced teleconnection in the CMIP5**  
 155 **historical experiment. a–e**, MME regression coefficients of March–May mean sea-level  
 156 pressure (Pa), 850-hPa wind (a), 300-hPa geopotential height (m) and wind (b), surface  
 157 temperature (K) (c), precipitation ( $\text{mm day}^{-1}$ ) (d), and GPP ( $\text{gC m}^{-2} \text{yr}^{-1}$ ) (e)  
 158 to the March ART index based on 25 ESMs in the historical experiment. Hatching  
 159 denotes local significance at the 95% confidence level based on a Student's  $t$ -test. The



160 CMIP5 ESMs simulate atmospheric teleconnection related to anomalous Arctic warming  
161 to a certain degree, but temperature anomalies over the northern part of North America  
162 relatively small to the observational result as shown in Fig. 1. Also, precipitation  
163 anomalies pattern shows significant positive anomalies over east and west coastal region  
164 in the United State; however, negative signal in the South Central United State does not  
165 represent in the ESMs in contrast to observational result. This bias would be related to  
166 underestimation of GPP anomalies with respect to the ART index.

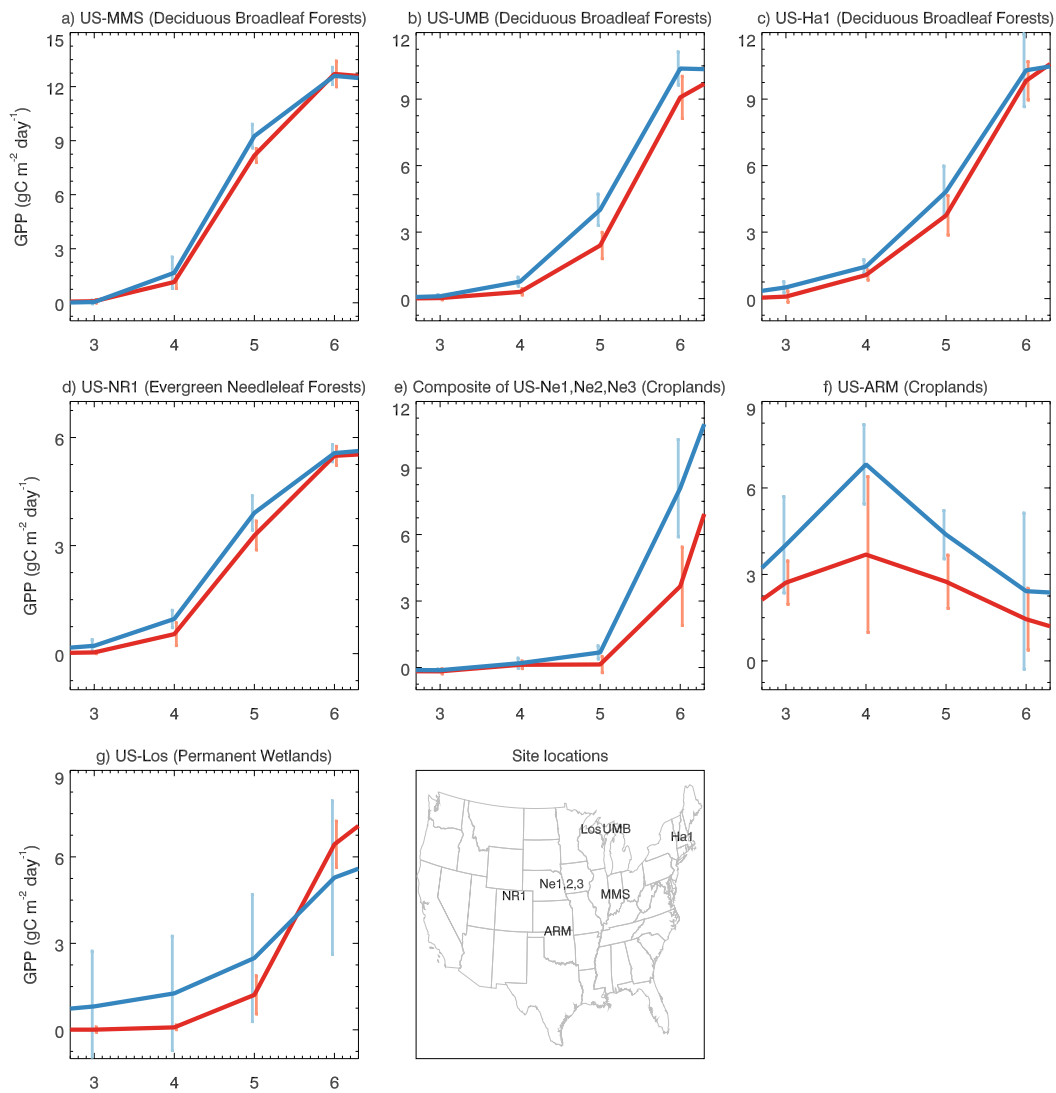

167  
 168 **Supplementary Figure 7 | Flux tower GPP for the cases of Arctic warming and**  
 169 **cooling. a–f**, Composite of monthly GPP ( $\text{gC m}^{-1} \text{day}^{-1}$ ) in individual flux towers in the  
 170 cases of Arctic warming (red) and cooling (blue). Error bars indicate 95% confidence  
 171 levels. US-MMS (a), US-UMB (b), US-Ha1 (c), US-NR1 (d), composite of US-Ne1,  
 172 Ne2, and Ne3 (e), US-ARM (f), and US-Los (g) are used to obtain composites in the  
 173 cases of Arctic warming and cooling. As each site has different periods of data  
 174 availability, Arctic warming and cooling events are defined by ART anomalies for each  
 175 period for which data are available. Site locations are marked on the map.  
 176

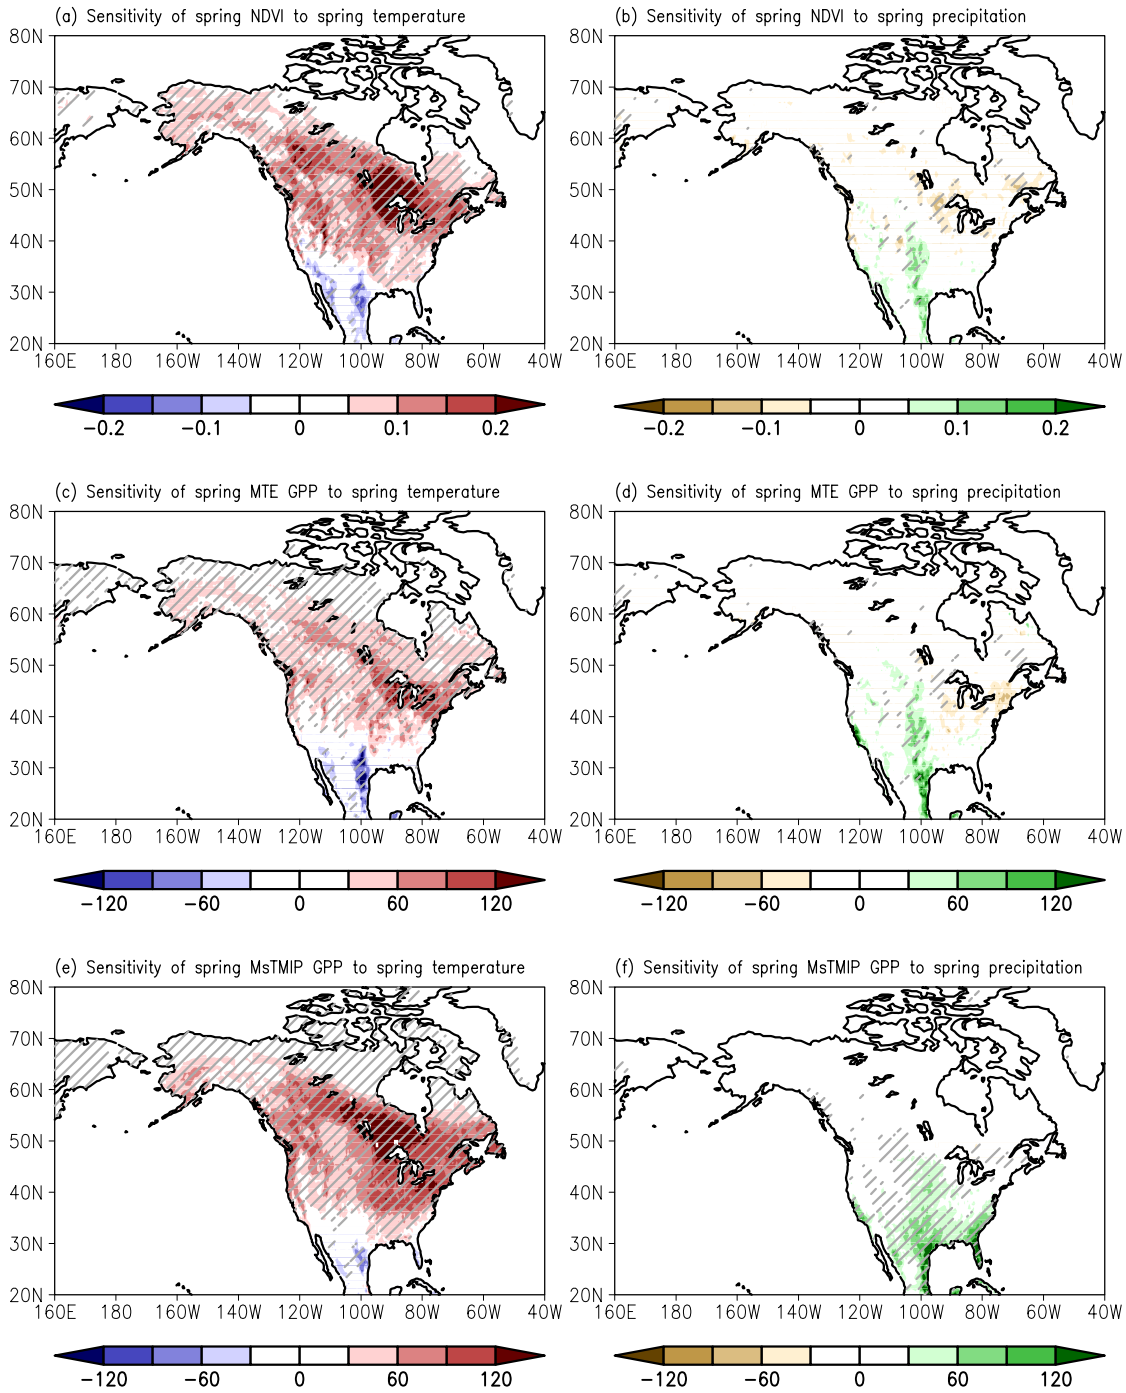

177  
 178  
 179  
 180  
 181  
 182  
 183

**Supplementary Figure 8 | Sensitivity of spring terrestrial productivity to local spring temperature and precipitation.** a–f, Partial regression coefficients of spring (March–May) NDVI (a, b), data-driven GPP (c, d), and MME MsTMIP GPP (e, f) ( $\text{gC m}^{-2} \text{yr}^{-1}$ ) with respect to spring temperature and precipitation based on CRU TS3.23. Hatching denotes local significance at the 95% confidence level based on a Student’s *t*-test.

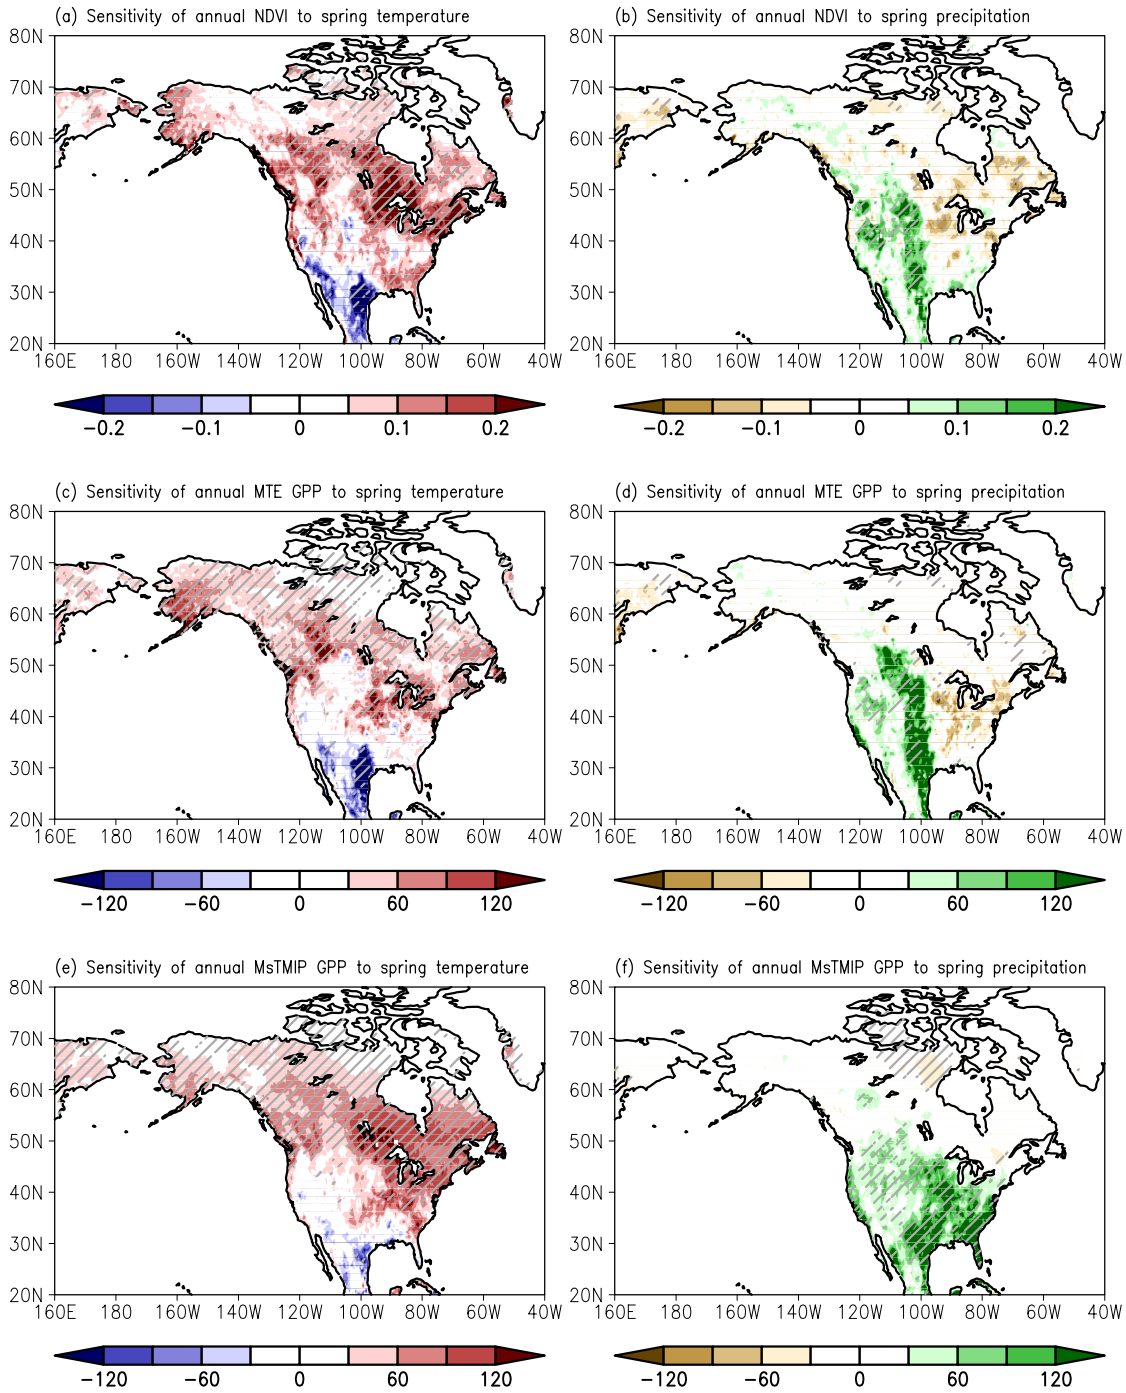

184  
185  
186  
187  
188  
189  
190

**Supplementary Figure 9 | Sensitivity of annual terrestrial productivity to local spring temperature and precipitation.** a–f, Partial regression coefficients of annual (Jan–Dec) NDVI (a, b), data-driven GPP, and MME MstMIP GPP (e, f) ( $\text{gC m}^{-2} \text{yr}^{-1}$ ) (c, d) with respect to spring (March–May) temperature and precipitation based on CRU TS3.23. Hatching denotes local significance at the 95% confidence level based on a Student’s *t*-test.

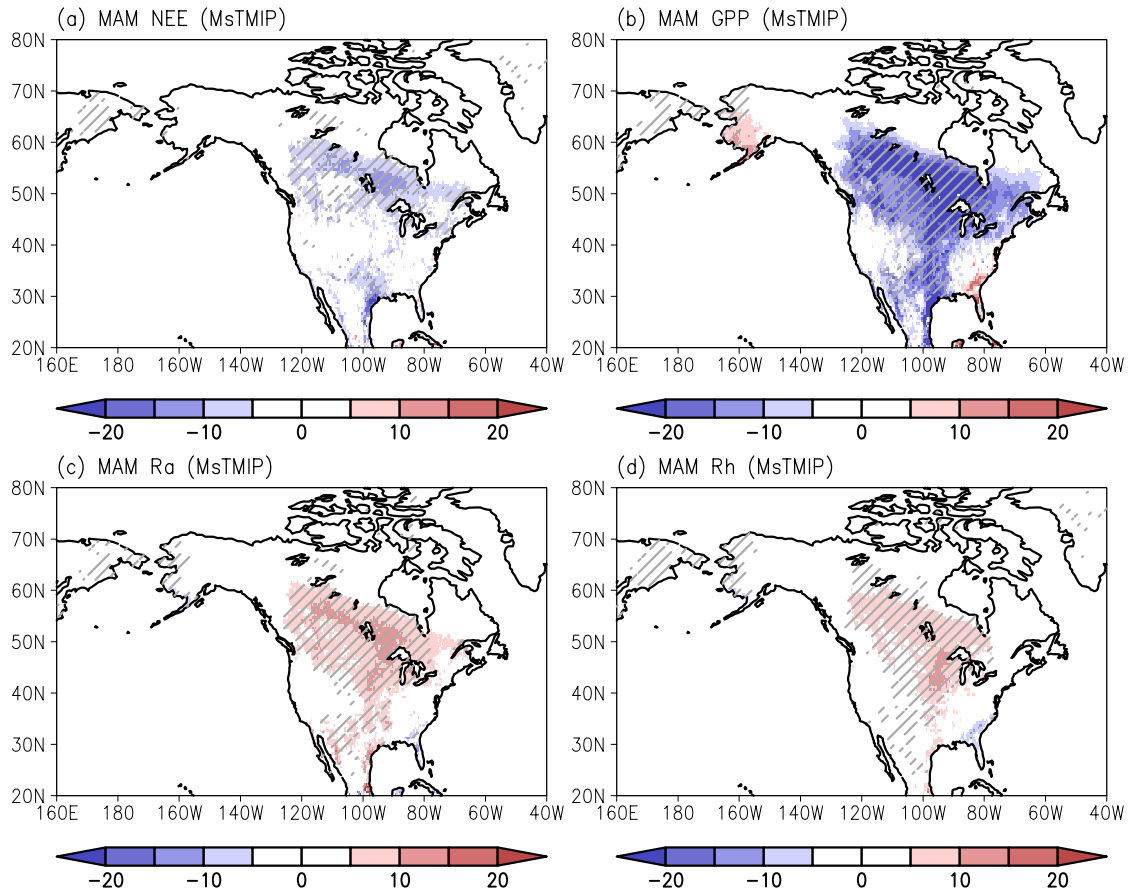

191  
 192 **Supplementary Figure 10 | Arctic warming impacts on terrestrial processes. a–d,**  
 193 **Regression coefficients of the spring (March–May) MME simulated NEE (a), GPP (b),**  
 194  **$R_a$  (c), and  $R_h$  (d) based on the Multi-scale Synthesis and Terrestrial Model**  
 195 **Intercomparison Project (MsTMIP) ( $\text{gC m}^{-2} \text{yr}^{-1}$ ) with respect to the ART index.**  
 196 **Hatching denotes local significance at the 95% confidence level on the basis of a**  
 197 **Student’s  $t$ -test.**

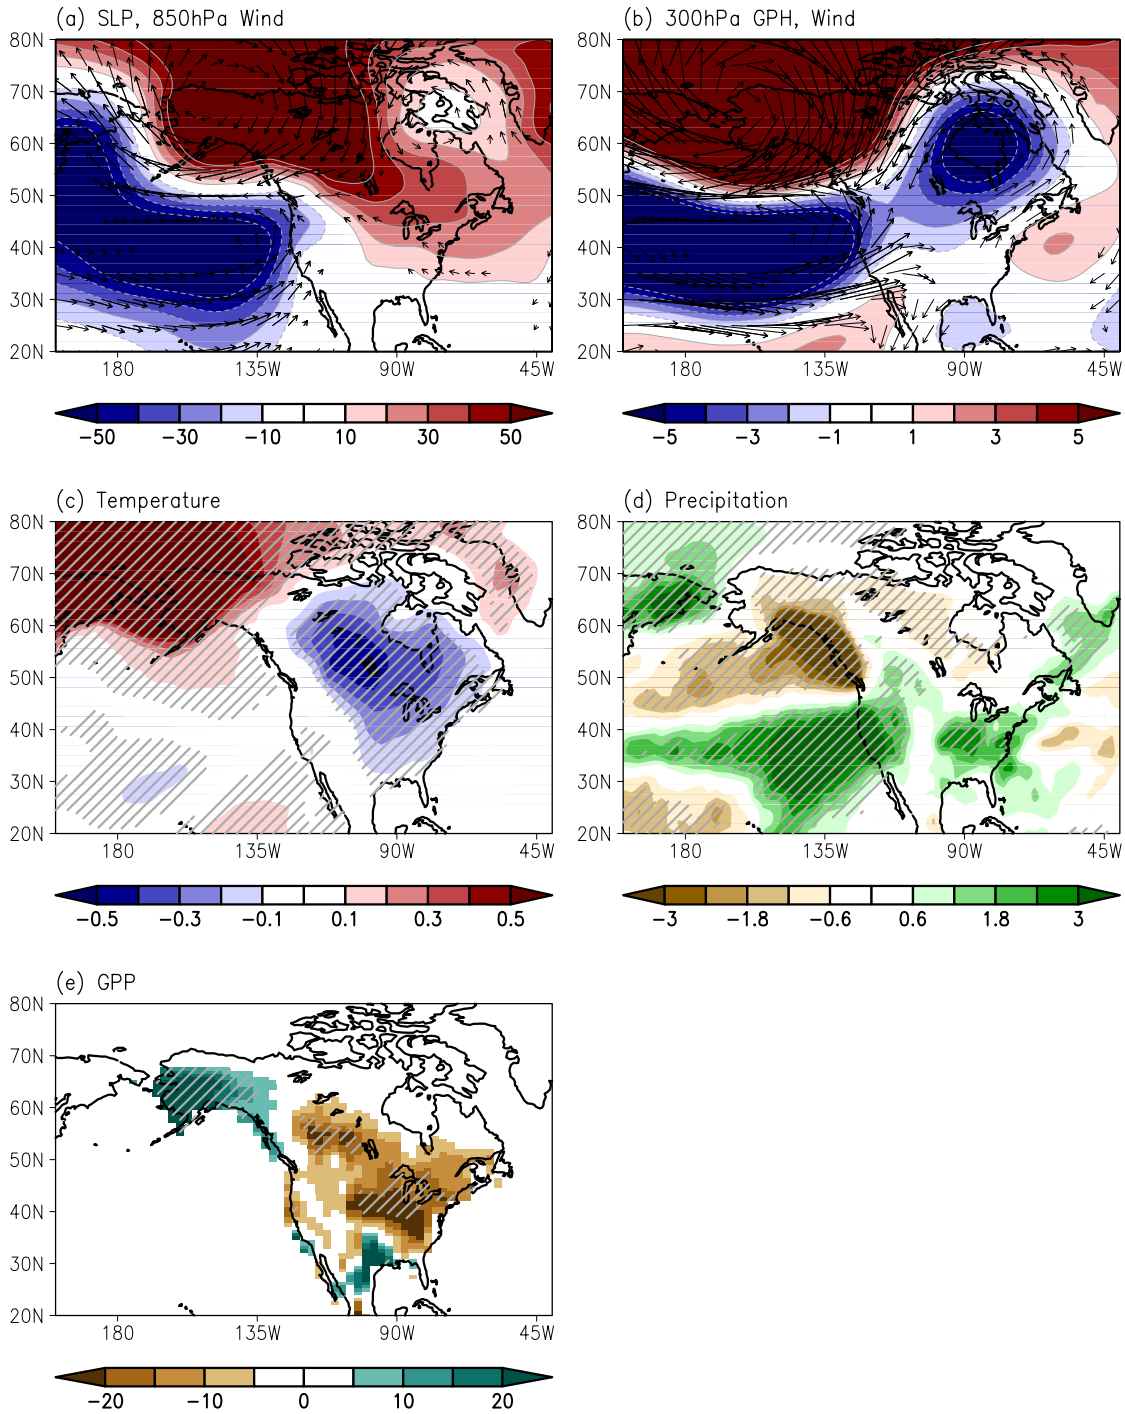

198  
 199 **Supplementary Figure 11 | Arctic temperature-induced teleconnection in the**  
 200 **CMIP5 future projection. a–e**, MME regression coefficients of March–May mean sea-  
 201 level pressure (Pa), 850-hPa wind (a), 300-hPa geopotential height (m) and wind (b),  
 202 surface temperature (K) (c), precipitation (mm day<sup>-1</sup>) (d), and GPP (gC m<sup>-2</sup> yr<sup>-1</sup>) (e)  
 203 with respect to the ART index based on 25 Earth System Models in the RCP4.5 experiment.  
 204 Hatching denotes local significance at the 95% confidence level based on a Student’s *t*-  
 205 test.

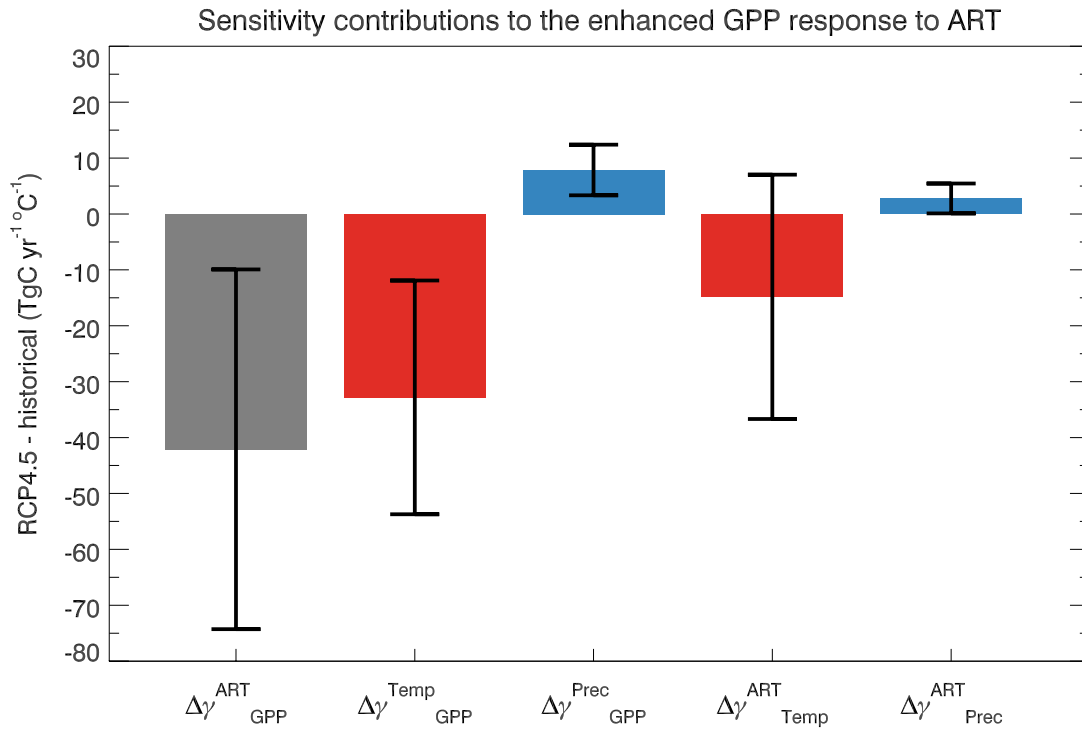

206  
 207  
 208  
 209  
 210  
 211  
 212  
 213  
 214  
 215

**Supplementary Figure 12 | Sensitivity contributions to the enhanced GPP response to Arctic temperature variation.** Gray bar indicates differences in the regression coefficients of MAM GPP anomalies over North America (125°–85° W, 30°–60° N) with respect to the ART index between the historical (1976–2005) and RCP4.5 (2070–2099) scenario ( $\Delta\gamma_{GPP}^{ART}$ ). The others indicate each term in Eq. 3 that are contribution to future changes in the GPP sensitivity to temperature ( $\Delta\gamma_{GPP}^{Temp, ART}$ ) and precipitation ( $\Delta\gamma_{GPP}^{Prec, ART}$ ), and future changes in the temperature ( $\Delta\gamma_{Temp}^{ART}$ ) and precipitation anomalies ( $\Delta\gamma_{Prec}^{ART}$ ) with respect to Arctic temperature variation. Each bar shows the MME results and error bars indicate 95% confidence levels based on the Student’s *t*-test.
